# Supplementary material for: Signature and Prediction of Perigastric Lymph Node Metastasis in Patients with Gastric Cancer and Total Gastrectomy: Is Total Gastrectomy Always Necessary?
Source: MDPI journal article supplement (doi:10.3390/cancers14143409), 2022-07-13
Supplement: s1 [file s1]

**Table S1.** Baseline characteristics in relation to tumor location.

| Variables                        | Upper third    | Middle third   | Lower third    | Overall        |
|----------------------------------|----------------|----------------|----------------|----------------|
| Sex (%)                          |                |                |                |                |
| Male                             | 137 (77.8)     | 73 (75.3)      | 24 (88.9)      | 234 (78.0)     |
| Female                           | 39 (22.2)      | 24 (24.7)      | 3 (11.1)       | 66 (22.0)      |
| Age, year (%)                    |                |                |                |                |
| Median (range)                   | 67.5 (28–80)   | 64 (35–79)     | 65 (49–80)     | 66.5 (28–80)   |
| < 65                             | 69 (39.2)      | 50 (51.5)      | 13 (48.1)      | 132 (44.0)     |
| ≥ 65                             | 107 (60.8)     | 47 (48.5)      | 14 (51.9)      | 168 (56.0)     |
| Tumor size, cm (%)               |                |                |                |                |
| Median (range)                   | 5.2 (0.6–21.0) | 6.5 (1.2–20.5) | 6.2 (1.1–17.0) | 5.5 (0.6–21.0) |
| < 4.0                            | 43 (24.4)      | 23 (23.7)      | 9 (33.3)       | 75 (25.0)      |
| ≥ 4.0                            | 133 (75.6)     | 74 (76.3)      | 18 (66.7)      | 225 (75.0)     |
| Cross section (%)                |                |                |                |                |
| Lesser curvature                 | 75 (42.6)      | 46 (47.4)      | 14 (51.9)      | 135 (45.0)     |
| Great curvature                  | 10 (5.7)       | 10 (10.3)      | 0 (0)          | 20 (6.7)       |
| Anterior wall                    | 28 (15.9)      | 12 (12.4)      | 2 (7.4)        | 42 (14.0)      |
| Posterior wall                   | 54 (30.7)      | 14 (14.4)      | 7 (25.9)       | 75 (25.0)      |
| Circle                           | 9 (5.1)        | 15 (15.5)      | 4 (14.8)       | 28 (9.3)       |
| UICC 8 <sup>th</sup> T stage (%) |                |                |                |                |
| T1 (M/SM)                        | 60 (34.1)      | 35 (36.1)      | 7 (25.9)       | 102 (34.0)     |
| T2 (MP)                          | 23 (13.1)      | 6 (6.2)        | 2 (7.4)        | 31 (10.3)      |
| T3 (SS)                          | 53 (30.1)      | 21 (21.6)      | 4 (14.8)       | 78 (26.0)      |
| T4a (S)                          | 37 (21.0)      | 31 (32.0)      | 13 (48.1)      | 81 (27.0)      |
| T4b (SI)                         | 3 (1.7)        | 4 (4.1)        | 1 (3.7)        | 8 (2.7)        |
| UICC 8 <sup>th</sup> N stage (%) |                |                |                |                |
| N0                               | 80 (45.5)      | 42 (43.3)      | 11 (40.7)      | 133 (44.3)     |
| N1                               | 37 (21.0)      | 17 (17.5)      | 4 (14.8)       | 58 (19.3)      |
| N2                               | 22 (12.5)      | 16 (16.5)      | 5 (18.5)       | 43 (14.3)      |
| N3a                              | 24 (13.6)      | 10 (10.3)      | 5 (18.5)       | 39 (13.0)      |
| N3b                              | 13 (7.4)       | 12 (12.4)      | 2 (7.4)        | 27 (9.0)       |
| Pathological type (%)            |                |                |                |                |
| Well differentiated              | 42 (23.9)      | 24 (24.7)      | 13 (48.1)      | 79 (26.3)      |
| Poorly differentiated            | 34 (19.3)      | 29 (29.9)      | 3 (11.1)       | 66 (22.0)      |
| Mixed type                       | 94 (53.4)      | 43 (44.3)      | 11 (40.7)      | 148 (49.3)     |
| Others                           | 6 (3.4)        | 1 (1.0)        | 0 (0)          | 7 (2.3)        |
| Retrieved lymph nodes (%)        |                |                |                |                |
| Median (range)                   | 49 (14–129)    | 49 (11–132)    | 47 (14–98)     | 48 (11–132)    |
| Adequate (n ≥ 16)                | 174 (98.9)     | 94 (96.9)      | 26 (96.3)      | 294 (98.0)     |
| Inadequate (n < 16)              | 2 (1.1)        | 3 (3.1)        | 1 (3.7)        | 6 (2.0)        |
| Positive lymph nodes             |                |                |                |                |
| Median (range)                   | 1 (0–29)       | 1 (0–83)       | 2 (0–22)       | 1 (0–83)       |

|                           |               |              |             |               |
|---------------------------|---------------|--------------|-------------|---------------|
| Lymphatic invasion (%)    |               |              |             |               |
| No                        | 75 (42.6)     | 40 (41.2)    | 10 (37.0)   | 125 (41.7)    |
| Yes                       | 101 (57.4)    | 57 (58.8)    | 17 (63.0)   | 175 (58.3)    |
| Venous invasion (%)       |               |              |             |               |
| No                        | 56 (31.8)     | 34 (35.1)    | 6 (22.2)    | 96 (32.0)     |
| Yes                       | 120 (68.2)    | 63 (64.9)    | 21 (77.8)   | 204 (68.0)    |
| Adjuvant chemotherapy (%) |               |              |             |               |
| No                        | 95 (54.0)     | 47 (48.5)    | 13 (48.1)   | 155 (51.7)    |
| Yes                       | 81 (46.0)     | 50 (51.5)    | 14 (51.9)   | 145 (48.3)    |
| sDPD, cm                  |               |              |             |               |
| Median (range)            | 12.0 (0–21.0) | 8.0 (0–19.0) | 3.0 (0–9.5) | 10.0 (0–21.0) |

---

UICC, Union for International Cancer Control; sDPD, the shortest distance from the pylorus ring to distal edge of the tumor.

**Table S2.** Perigastric lymph node metastasis rate in relation to tumor location.

| Station | Upper third                   |                   |                       | Middle third                 |                   |                       | Lower third                  |                   |                       |
|---------|-------------------------------|-------------------|-----------------------|------------------------------|-------------------|-----------------------|------------------------------|-------------------|-----------------------|
|         | Total number for 176 patients |                   |                       | Total number for 97 patients |                   |                       | Total number for 27 patients |                   |                       |
|         | Total<br>LNs                  | Metastasis<br>LNs | Metastasis<br>rate, % | Total<br>LNs                 | Metastasis<br>LNs | Metastasis<br>rate, % | Total<br>LNs                 | Metastasis<br>LNs | Metastasis<br>rate, % |
| 1       | 1000                          | 106               | 10.6%                 | 489                          | 52                | 10.6%                 | 133                          | 16                | 12.0%                 |
| 2       | 568                           | 58                | 10.2%                 | 241                          | 15                | 6.2%                  | 69                           | 2                 | 2.9%                  |
| 3       | 1277                          | 144               | 11.3%                 | 673                          | 130               | 19.3%                 | 134                          | 25                | 18.7%                 |
| 4sa     | 335                           | 16                | 4.8%                  | 270                          | 50                | 18.5%                 | 46                           | 3                 | 6.5%                  |
| 4sb     | 489                           | 27                | 5.5%                  | 273                          | 24                | 8.8%                  | 60                           | 5                 | 8.3%                  |
| 4d      | 1324                          | 18                | 1.4%                  | 800                          | 91                | 11.4%                 | 155                          | 17                | 11.0%                 |
| 5       | 121                           | 1                 | 0.8%                  | 54                           | 8                 | 9.3%                  | 15                           | 2                 | 13.3%                 |
| 6       | 764                           | 0                 | 0%                    | 464                          | 41                | 8.8%                  | 134                          | 15                | 11.2%                 |

LNs, lymph nodes; n, number of patients.

**Table S3.** Univariate and multivariate analyses of predictive factors for entire lymph node metastasis.

| Variables                                               | Univariate analysis |             |                | Multivariate analysis (1 <sup>st</sup> ) |             |                |
|---------------------------------------------------------|---------------------|-------------|----------------|------------------------------------------|-------------|----------------|
|                                                         | OR                  | 95% CI      | <i>P</i> value | OR                                       | 95% CI      | <i>P</i> value |
| Sex (male / female)                                     | 1.967               | 1.104–3.506 | 0.022          | 1.927                                    | 0.905–4.103 | 0.086          |
| Age (continuous variable)                               | 0.994               | 0.972–1.016 | 0.592          | –                                        | –           | –              |
| Tumor size (continuous variable)                        | 1.021               | 1.013–1.029 | <0.001         | 1.007                                    | 0.998–1.016 | 0.105          |
| Tumor location (upper / middle / lower)                 | 1.097               | 0.774–1.555 | 0.602          | –                                        | –           | –              |
| Cross section (Les / Gre / Ant / Post / Cir)            | 1.009               | 0.866–1.176 | 0.906          | –                                        | –           | –              |
| sDPD (continuous variable)                              | 0.984               | 0.941–1.029 | 0.478          | –                                        | –           | –              |
| Pathological type (well / poorly / mixed / others)      | 1.767               | 1.349–2.315 | <0.001         | 1.492                                    | 1.072–2.076 | 0.018          |
| UICC 8 <sup>th</sup> T stage (T1 / T2 / T3 / T4a / T4b) | 2.707               | 2.146–3.413 | <0.001         | 1.726                                    | 1.290–2.310 | <0.001         |
| Retrieved lymph nodes (adequate / inadequate)           | 0.793               | 0.157–3.993 | 0.778          | –                                        | –           | –              |
| Lymphatic invasion (no / yes)                           | 7.894               | 4.691–13.28 | <0.001         | 2.439                                    | 1.284–4.634 | 0.006          |
| Venous invasion (no / yes)                              | 8.267               | 4.703–14.53 | <0.001         | 2.900                                    | 1.399–6.011 | 0.004          |

Logistic regression analyses were performed for univariate and multivariate analyses. CI, confidence interval; n, number of patients; sDPD, the shortest distance from the pylorus ring to distal edge of the tumor; OR, odds ratio; OS, overall survival; UICC, Union for International Cancer Control; Les, lesser curvature; Gre, great curvature; Ant, anterior wall; Post, posterior wall; Cir, circle. Variables with *P* values < 0.05 in univariate analysis were applied in multivariate analysis.
